# Supplementary material
Source: PubMed Central journal article supplement (PMC3084588)
Supplement: NIHMS279749-supplement-01.pdf [file NIHMS279749-supplement-01.pdf]

**Supplemental Information**  
Cell Metabolism, *Volume 13*

**Exercise and PGC1 $\alpha$ -Independent Synchronization of Type I Muscle**

**Metabolism and Vasculature by ERR $\gamma$**

Vihang A. Narkar, Weiwei Fan, Michael Downes, Ruth T. Yu, Johan W. Jonker,  
William A. Alaynick, Ester Banayo, Malith S. Karunasiri, Sabina Lorca, and Ronald M. Evans

**SUPPLEMENTAL EXPERIMENTAL PROCEDURES**

**Succinate Dehydrogenase (SDH) Staining.** SDH staining was performed on 6 $\mu$ M cryo-sections of gastrocnemius. Briefly, WT and transgenic sections were incubated at 37°C for 10 min in substrate buffer [0.2M Phosphate buffer containing sodium succinate (250mg/10ml) and NBT (10mg/10ml)]. Following incubation, sections were washed three times with water following by two washes each with increasing and decreasing concentrations of acetone (30%, 60%, 90%). Finally, the sections were washed three times with water and mounted in an aqueous mounting media.

**Immunohistochemistry.** Gastrocnemius muscles isolated from WT and transgenic mice were equilibrated in 30% sucrose (in PBS) for 2-3 hr and frozen in OCT. Cryo-sections (10 $\mu$ M) were fixed (4% paraformaldehyde-PBS), permeabilized (0.3% Triton X-PBS) and blocked (normal goat serum-PBS) before antibody treatment. Further, the sections were incubated overnight at 4°C with anti-PECAM 1 antibody (1:25 in PBS, SEROTEC), washed three times with PBS, incubated with anti-rat secondary antibody (1:250, ALEXA FLOR 344), washed three times with PBS and mounted in VECTASHIELD. For negative controls,

primary antibody was replaced with normal goat serum-PBS for overnight incubation.

**Alkaline phosphatase staining.** For AP staining, 10 $\mu$ M muscle sections were fixed in ice-cold acetone (5 min, -20°C), incubated in Tris-buffered Naphthol AS-MX phosphate/ N, N Dimethylformamide solution (30 min, 37°C), rinsed with distilled water (3x2min) and mounted with aqueous media.

**Cell culture, in vitro angiogenesis and Vegfa ELISA.** C2C12 myoblasts were grown in 20% FBS-DMEM and differentiated in 2% horse serum-DMEM [with penicillin/streptomycin]. Conditioned media from two day differentiated WT and ERR $\gamma$  over-expressing C2C12 myotubules were used in the in vitro angiogenesis assay. Murine endothelial SVEC4-10 cells were cultured and maintained in DMEM containing 10% fetal bovine serum and penicillin/streptomycin. On the day of the experiment 4 X 10<sup>5</sup> cells/500 $\mu$ l/well were plated in matrigel-coated 12-well plates. The cells were immediately treated for 7 hr with C2C12 cell conditioned media (250 $\mu$ l), followed by evaluation of tube formation. Vegfa concentration in the conditioned media was measured using commercial Elisa kit according manufacturer's instructions [Research & Diagnostics].

**Treadmill endurance test.** WT and transgenic mice were acclimated to treadmill running (8 meters/min for 15 min) every other day for 1 week before the test. For the endurance testing, the mice were run on a treadmill at 5° inclination as the speed was gradually increased to 14 meters/min. After reaching 14 m/min, mice were run to exhaustion at constant speed. Endurance was measured as the function of time and distance ran.

### **Figure S1. Oxidative Biomarker Expression in Wild-Type and Transgenic Mice**

Protein expression levels of myoglobin and cytochrome c (cycs) in wild-type, TG 425 and TG 421 quadriceps (N=3).

### **Figure S2. ERR $\gamma$ in Cultured Muscle Cells**

(A) ERR $\gamma$  knockdown in primary myoblast. Primary myoblast were prepared from soleus and red gastrocnemius and infected with either control or ERR $\gamma$  siRNA. Expression of ERR $\gamma$  and oxidative biomarkers (cycs, ucp3, Acsc11, Cox6a2, Ppara) was measured in control (open bars) and ERR $\gamma$  (closed bars) knockdown primary muscle cells. Data is presented as mean $\pm$ SD. (\*) Indicates statistically significant difference between control and ERR $\gamma$  knockdown cells ( $p < 0.05$ , unpaired Student's t-test). (B-C) Mitochondrial bioenergetics in wild-type and ERR $\gamma$  over-expressing C2C12 cells. (B) Basal oxygen consumption rate (OCR) representing mitochondrial respiration. (C) Basal extracellular acidification rate (ECAR) representing glycolysis. Data are presented as mean $\pm$ SD. (\*) Indicates statistically significant difference between the two groups. ( $p < 0.05$ , unpaired Student's t-test).

### **Figure S3. ERR $\gamma$ Activates Vegfa Promoter**

Vegfa gene 5' of the transcriptional start site containing promoter region was PCR cloned from mouse genomic DNA and sub-cloned up-stream of luciferase gene in pGL3 vector. All three isoforms of ERR (ERR $\alpha$ , ERR $\beta$  and ERR $\gamma$ ) transcriptionally activated Vegfa promoter. Data presented as mean $\pm$ SD.

#### **Figure S4. Physiological Changes in Wild-Type and ERR $\gamma$ Transgenic Mice**

(A) The ambulatory activity, measured using CLMAC units, is comparable between the wild-type and the transgenic mice. Data are presented as mean $\pm$ SEM. (B) Average weight gain in wild-type and transgenic mice on high fat diet (N=6). Data are presented as mean $\pm$ SD. (\*) Indicates statistically significant difference between the two groups. (p<0.05, unpaired Student's t-test).

#### **Figure S5.**

(A) PGC1 $\alpha$  acetylation in the skeletal muscle. Nuclear extracts were prepared from freshly isolated quadriceps from wild-type and ERRGO mice using a commercially available kit according to the manufacturer's instructions (Thermo Scientific\* NE-PER\* Nuclear and Cytoplasmic Extraction Kit, Cat no. PI-78833). PGC1 $\alpha$  was immunoprecipitated using anti-PGC1 $\alpha$  antibody (Santacruz, Cat no. sc-13067) from the nuclear extracts and acetylation levels detected using anti-acetyl lysine antibody (Cell Signaling, Cat no. 9441S). *Upper panel.*

Representative blots of acetylated and total PGC1 $\alpha$  immunoprecipitated from wild-type and ERRGO nuclear extracts. *Lower panel.* Densitometric analysis (using Image J) presented as the ratio of acetylated to total PGC1 $\alpha$  in the wild-type and ERRGO muscles. There is no statistically significant difference

between the two groups. (B) Phospho-ACC levels in wild-type and ERR $\gamma$  transgenic muscle. ACC phosphorylation was measured in murine quadriceps using an antibody that specifically detects phospho-ACC (Cell Signaling, Cat no. 3661). The blot represents phospho-ACC levels in wild-type and ERR $\gamma$  transgenic quadriceps from N=3 samples in each group. (C) ATP levels in wild-

type and ERR $\gamma$  over-expressing C2C12 cells. Absolute ATP level in C2C12 cells was measured using the ATP Bioluminescent Assay Kit according to manufacturer's instruction (Sigma, Cat No. FLAA-1KT). Briefly,  $5 \times 10^4$  cells were lysed with 100 $\mu$ l ATP releasing reagent for 10 minutes and combined with 100 $\mu$ l water. The standards (20, 10, 2, 1, 0.2, and 0.1  $\mu$ M) were made by mixing 100 $\mu$ l ATP releasing reagent with 100 $\mu$ l ATP solutions. Next, 100 $\mu$ l ATP assay solution was added to a 96-well black plate with solid bottom and mixed with 100 $\mu$ l samples or standards. Luminescence was measured using the EnVision plate reader (PerkinElmer) and absolute ATP levels were calculated. ATP levels in wild-type and ERR $\gamma$  over-expressing C2C12 cells are presented as mean $\pm$ SD (nmol per  $2 \times 10^4$  cells). \* Represents statistically significant difference between groups ( $p < 0.05$ , unpaired Student's t-test).

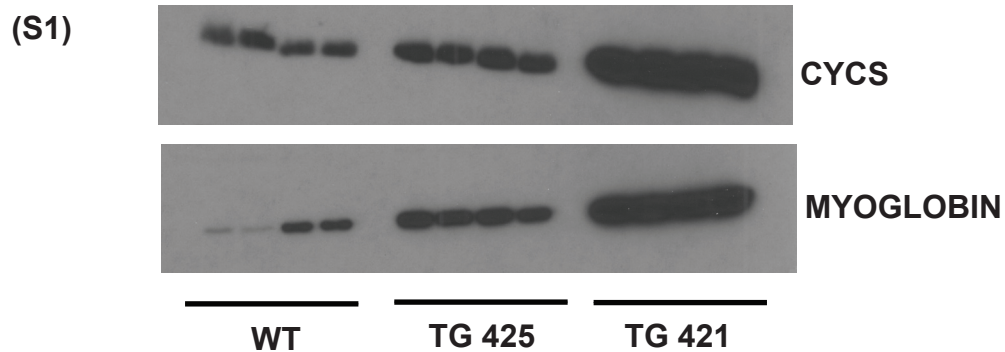

(S2 A)  Control siRNA  ERRg siRNA

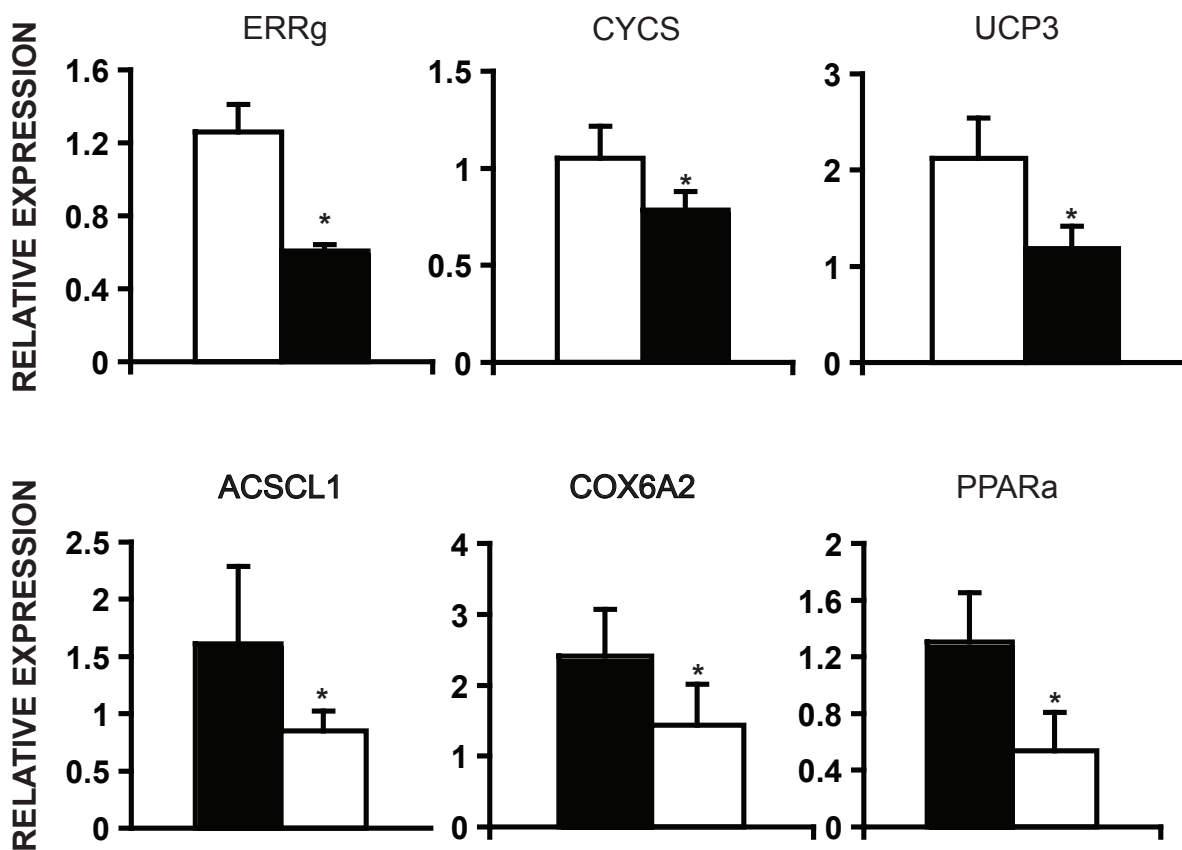

(S2 B)

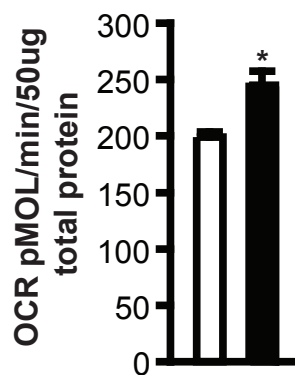

(S2 C)

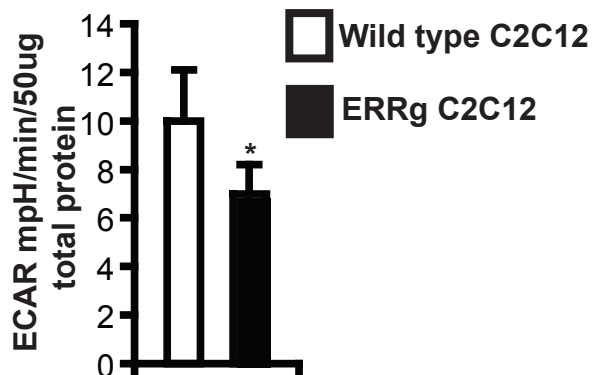

(S3)

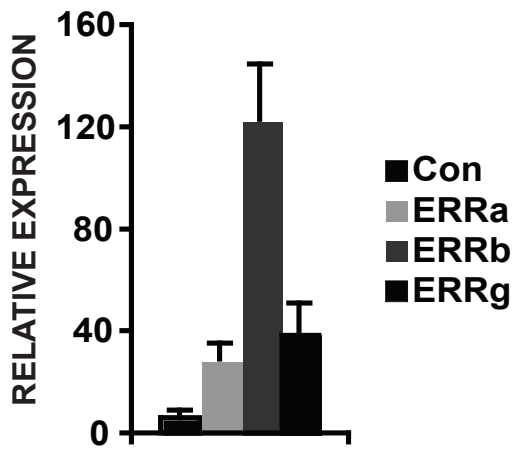

(S4 A)

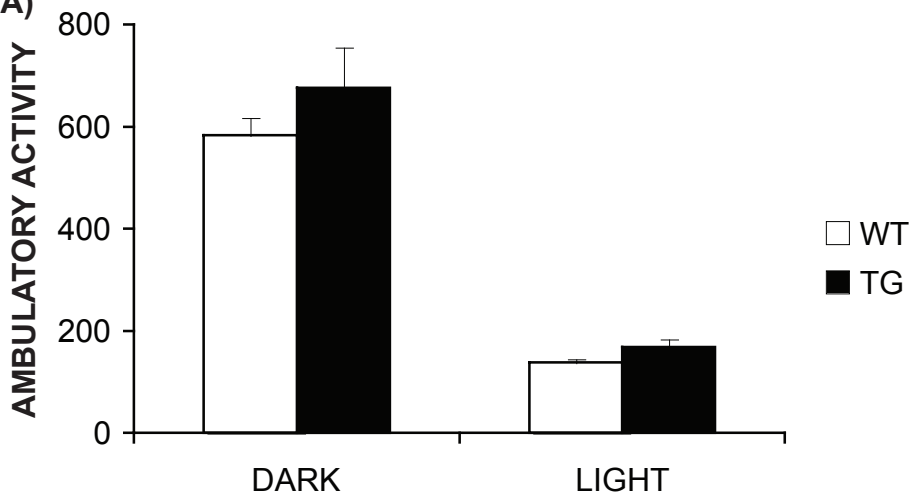

(S4 B)

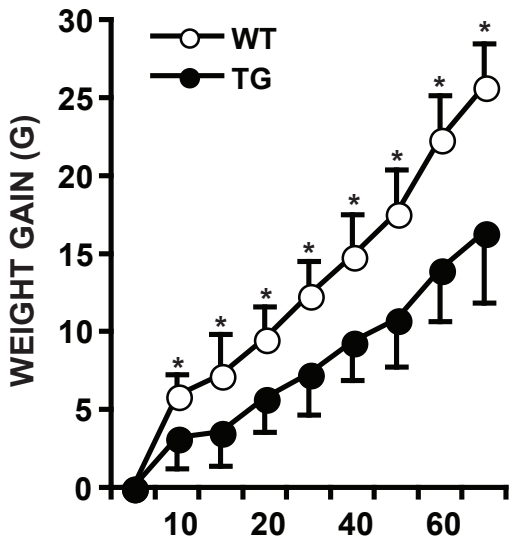

(S5 A)

PGC1 $\alpha$  acetylation

IP: Anti-PGC1 $\alpha$  Ab  
WB: Anti-acetyl lysine Ab

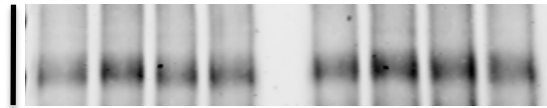

WT

TG

IP: Anti-PGC1 $\alpha$  Ab  
WB: Anti-PGC1 $\alpha$  Ab

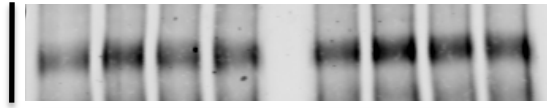

WT

TG

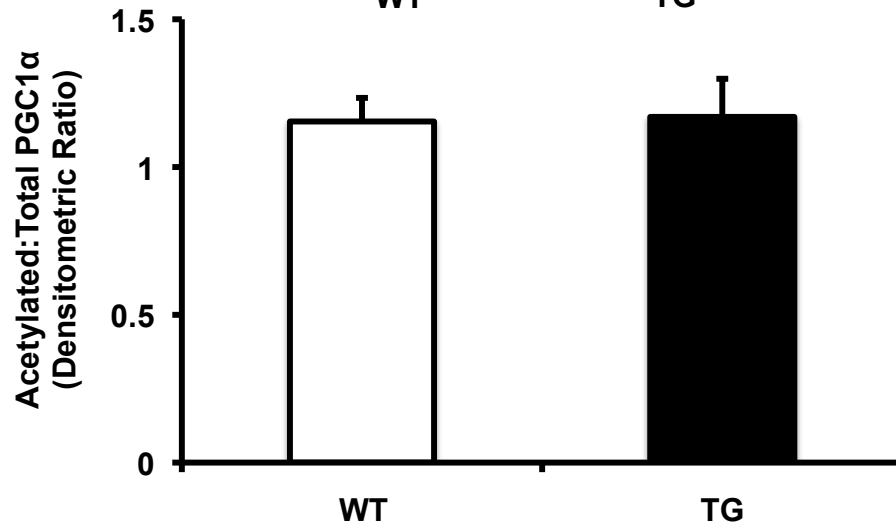

(S5 B) Phospho-ACC

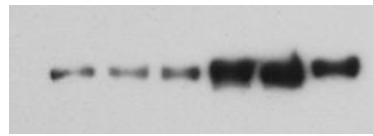

WT

TG

(S5 C)

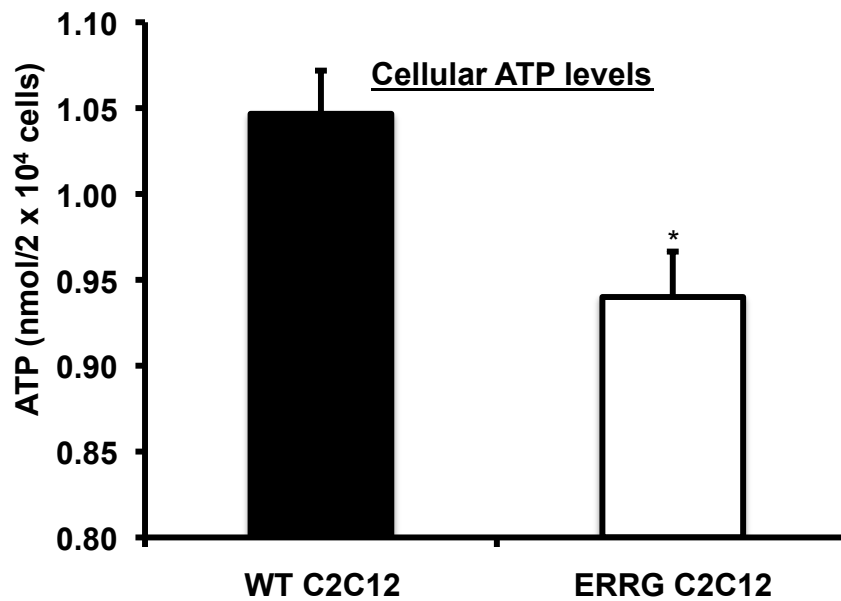



**Table S1.** Global gene expression was compared between wild type and ERR $\gamma$  transgenic quadriceps. The positively regulated genes were subjected to gene ontology classification. The genes linked to mitochondrial respiration and/or fatty acid oxidation are described below (N=3, each pooled from 3 mice, p<0.05, Bonferroni's multiple comparison test).

| <b>Locus</b>  | <b>Fold</b> | <b>Description</b>                                                                |
|---------------|-------------|-----------------------------------------------------------------------------------|
| 1300010F03Rik | 2.135       | RIKEN cDNA 1300010F03 gene                                                        |
| 1700020C11Rik | 2.604       | RIKEN cDNA 1700020C11 gene                                                        |
| 1700034H14Rik | 1.742       | RIKEN cDNA 1700034H14 gene                                                        |
| Acaa1a        | 2.169       | acetyl-Coenzyme A acyltransferase 1A                                              |
| Acaa2         | 3.473       | acetyl-Coenzyme A acyltransferase 2 (mitochondrial 3-oxoacyl-Coenzyme A thiolase) |
| Acadl         | 2.093       | acyl-Coenzyme A dehydrogenase, long-chain                                         |
| Acadm         | 1.931       | acyl-Coenzyme A dehydrogenase, medium chain                                       |
| Acads         | 1.713       | acyl-Coenzyme A dehydrogenase, short chain                                        |
| Acadvl        | 2.2         | acyl-Coenzyme A dehydrogenase, very long chain                                    |
| Acat1         | 1.943       | acetyl-Coenzyme A acetyltransferase 1                                             |
| Acot1         | 2.031       | acyl-CoA thioesterase 1                                                           |
| Acot11        | 2.356       | acyl-CoA thioesterase 11                                                          |
| Acot2         | 3.018       | acyl-CoA thioesterase 2                                                           |
| Acot7         | 1.952       | acyl-CoA thioesterase 7                                                           |
| Acs11         | 2.564       | acyl-CoA synthetase long-chain family member 1                                    |
| Adh1          | 1.843       | alcohol dehydrogenase 1 (class I)                                                 |
| Ak3l1         | 7.733       | adenylate kinase 3 alpha-like 1                                                   |
| Akap1         | 2.569       | A kinase (PRKA) anchor protein 1                                                  |
| Aldh2         | 2.484       | aldehyde dehydrogenase 2, mitochondrial                                           |
| Atad3a        | 1.78        | ATPase family, AAA domain containing 3A                                           |
| Atp5h         | 1.685       | ATP synthase, H <sup>+</sup> transporting, mitochondrial F0 complex, subunit d    |
| Bcat2         | 1.793       | branched chain aminotransferase 2, mitochondrial                                  |
| Bdh1          | 2.899       | 3-hydroxybutyrate dehydrogenase, type 1                                           |
| Cabc1         | 5.199       | chaperone, ABC1 activity of bc1 complex like (S. pombe)                           |
| Cat           | 1.919       | catalase                                                                          |
| Cds2          | 1.854       | CDP-diacylglycerol synthase (phosphatidate cytidyltransferase) 2                  |
| Chkb          | 2.021       | choline kinase beta                                                               |

|           |       |                                                                                                                                       |
|-----------|-------|---------------------------------------------------------------------------------------------------------------------------------------|
| Cox15     | 1.727 | COX15 homolog, cytochrome c oxidase assembly protein (yeast)                                                                          |
| Cox6a2    | 1.643 | cytochrome c oxidase, subunit VI a, polypeptide 2                                                                                     |
| Cpt1b     | 1.698 | carnitine palmitoyltransferase 1b, muscle                                                                                             |
| Cpt2      | 1.815 | carnitine palmitoyltransferase 2                                                                                                      |
| Ctsb      | 2.539 | cathepsin B                                                                                                                           |
| D10Jhu81e | 1.709 | DNA segment, Chr 10, Johns Hopkins University 81 expressed                                                                            |
| Dci       | 2.037 | dodecenoyl-Coenzyme A delta isomerase (3,2 trans-enoyl-Coenzyme A isomerase)                                                          |
| Decr1     | 2.745 | 2,4-dienoyl CoA reductase 1, mitochondrial                                                                                            |
| Dhrs4     | 2.103 | dehydrogenase/reductase (SDR family) member 4                                                                                         |
| Dlat      | 2.027 | dihydrolipoamide S-acetyltransferase (E2 component of pyruvate dehydrogenase complex)                                                 |
| Ech1      | 2.297 | enoyl coenzyme A hydratase 1, peroxisomal                                                                                             |
| Etfb      | 1.695 | electron transferring flavoprotein, beta polypeptide                                                                                  |
| Etfdh     | 1.962 | electron transferring flavoprotein, dehydrogenase                                                                                     |
| Fabp3     | 3.658 | fatty acid binding protein 3, muscle and heart                                                                                        |
| Fdft1     | 2.287 | farnesyl diphosphate farnesyl transferase 1                                                                                           |
| Gcdh      | 2.246 | glutaryl-Coenzyme A dehydrogenase                                                                                                     |
| Gfm1      | 2.099 | G elongation factor, mitochondrial 1                                                                                                  |
| Ggta1     | 1.767 | gamma-glutamyltransferase-like activity 1                                                                                             |
| Glrx5     | 2.036 | glutaredoxin 5 homolog ( <i>S. cerevisiae</i> )                                                                                       |
| Glud1     | 1.812 | glutamate dehydrogenase 1                                                                                                             |
| Got2      | 2.262 | glutamate oxaloacetate transaminase 2, mitochondrial                                                                                  |
| Hadh      | 1.969 | hydroxyacyl-Coenzyme A dehydrogenase                                                                                                  |
| Hadha     | 2.415 | hydroxyacyl-Coenzyme A dehydrogenase/3-ketoacyl-Coenzyme A thiolase/enoyl-Coenzyme A hydratase (trifunctional protein), alpha subunit |
| Hadhb     | 1.775 | hydroxyacyl-Coenzyme A dehydrogenase/3-ketoacyl-Coenzyme A thiolase/enoyl-Coenzyme A hydratase (trifunctional protein), beta subunit  |
| Hba-a1    | 4.779 | hemoglobin alpha, adult chain 1                                                                                                       |
| Herc2     | 1.786 | hect (homologous to the E6-AP (UBE3A) carboxyl terminus) domain and RCC1 (CHC1)-like domain (RLD) 2                                   |
| Hibadh    | 1.685 | 3-hydroxyisobutyrate dehydrogenase                                                                                                    |
| Hsd12     | 2.283 | hydroxysteroid dehydrogenase like 2                                                                                                   |
| Hspa9     | 1.673 | heat shock protein 9                                                                                                                  |
| Idh3b     | 1.749 | isocitrate dehydrogenase 3 (NAD+) beta                                                                                                |
| Ivd       | 1.843 | isovaleryl coenzyme A dehydrogenase                                                                                                   |
| Ldhd      | 2.18  | lactate dehydrogenase D                                                                                                               |

|         |       |                                                                         |
|---------|-------|-------------------------------------------------------------------------|
| Lpl     | 1.873 | lipoprotein lipase                                                      |
| Me3     | 1.657 | malic enzyme 3, NADP(+)-dependent, mitochondrial                        |
| Mfn1    | 1.855 | mitofusin 1                                                             |
| Mlycd   | 1.761 | malonyl-CoA decarboxylase                                               |
| Mrm1    | 1.868 | mitochondrial rRNA methyltransferase 1 homolog ( <i>S. cerevisiae</i> ) |
| Mrpl14  | 2.465 | mitochondrial ribosomal protein L14                                     |
| Mrpl19  | 1.875 | mitochondrial ribosomal protein L19                                     |
| Mrpl3   | 1.744 | mitochondrial ribosomal protein L3                                      |
| Mrpl9   | 1.734 | mitochondrial ribosomal protein L9                                      |
| Msrb2   | 2.412 | methionine sulfoxide reductase B2                                       |
| Mterfd3 | 2.284 | MTERF domain containing 3                                               |
| Mtx2    | 1.738 | metaxin 2                                                               |
| Mut     | 1.666 | methylmalonyl-Coenzyme A mutase                                         |
| Ndufab1 | 1.645 | NADH dehydrogenase (ubiquinone) 1, alpha/beta subcomplex, 1             |
| Ndufb2  | 1.734 | NADH dehydrogenase (ubiquinone) 1 beta subcomplex, 2                    |
| Ndufs8  | 1.895 | NADH dehydrogenase (ubiquinone) Fe-S protein 8                          |
| Ndufv1  | 1.648 | NADH dehydrogenase (ubiquinone) flavoprotein 1                          |
| Nnt     | 4.809 | nicotinamide nucleotide transhydrogenase                                |
| Nrip1   | 1.821 | nuclear receptor interacting protein 1                                  |
| Nudt8   | 2.662 | nudix (nucleoside diphosphate linked moiety X)-type motif 8             |
| Osbp1a  | 2.225 | oxysterol binding protein-like 1A                                       |
| Pdk4    | 2.692 | pyruvate dehydrogenase kinase, isoenzyme 4                              |
| Phca    | 2.679 | phytoceramidase, alkaline                                               |
| Pisd    | 1.679 | phosphatidylserine decarboxylase                                        |
| Pitpnc1 | 2.322 | phosphatidylinositol transfer protein, cytoplasmic 1                    |
| Pla2g4b | 4.406 | phospholipase A2, group IVB (cytosolic)                                 |
| Plcb4   | 2.431 | phospholipase C, beta 4                                                 |
| Plcd1   | 2.009 | phospholipase C, delta 1                                                |
| Ppara   | 2.444 | peroxisome proliferator activated receptor alpha                        |
| Ppif    | 1.989 | peptidylprolyl isomerase F (cyclophilin F)                              |
| Ppm1k   | 1.759 | protein phosphatase 1K (PP2C domain containing)                         |
| Prdx5   | 1.655 | peroxiredoxin 5                                                         |
| Prdx6   | 1.643 | peroxiredoxin 6                                                         |
| Qk      | 1.875 | quaking                                                                 |
| Rtn4ip1 | 2.032 | reticulon 4 interacting protein 1                                       |
| Sdhb    | 1.699 | succinate dehydrogenase complex, subunit B, iron sulfur (lp)            |
| Sfxn5   | 1.992 | sideroflexin 5                                                          |

|          |       |                                                                                             |
|----------|-------|---------------------------------------------------------------------------------------------|
| Slc25a20 | 2.989 | solute carrier family 25 (mitochondrial carnitine/acylcarnitine translocase), member 20     |
| Slc25a22 | 2.49  | solute carrier family 25 (mitochondrial carrier, glutamate), member 22                      |
| Slc25a4  | 3.435 | solute carrier family 25 (mitochondrial carrier, adenine nucleotide translocator), member 4 |
| Slc27a1  | 1.769 | solute carrier family 27 (fatty acid transporter), member 1                                 |
| Slc40a1  | 3.279 | solute carrier family 40 (iron-regulated transporter), member 1                             |
| Sod2     | 1.766 | superoxide dismutase 2, mitochondrial                                                       |
| Sorl1    | 2.367 | sortilin-related receptor, LDLR class A repeats-containing                                  |
| Tfam     | 1.754 | transcription factor A, mitochondrial                                                       |
| Timm44   | 1.683 | translocase of inner mitochondrial membrane 44                                              |
| Tomm22   | 2.072 | translocase of outer mitochondrial membrane 22 homolog (yeast)                              |
| Txn2     | 2.021 | thioredoxin 2                                                                               |
| Ucp3     | 2.838 | uncoupling protein 3 (mitochondrial, proton carrier)                                        |
| Ung      | 3.577 | uracil DNA glycosylase                                                                      |
| Uqcrcq   | 2.108 | ubiquinol-cytochrome c reductase, complex III subunit VII                                   |

**Table S2.** List of contractile genes induced by ERR $\gamma$  in quadriceps of the transgenic mice (N=3, each pooled from 3 mice, p<0.05, Bonferroni's multiple comparison test).

| <b>Locus</b> | <b>Fold</b> | <b>Description</b>                                           |
|--------------|-------------|--------------------------------------------------------------|
| Abra         | 2.915       | actin-binding Rho activating protein                         |
| Actn2        | 4.281       | actinin alpha 2                                              |
| Ankrd2       | 9.885       | ankyrin repeat domain 2 (stretch responsive muscle)          |
| Csrp3        | 8.534       | cysteine and glycine-rich protein 3                          |
| Kcnj8        | 1.824       | potassium inwardly-rectifying channel, subfamily J, member 8 |
| Myh2         | 5.84        | myosin, heavy polypeptide 2, skeletal muscle, adult          |
| Myoz2        | 3.67        | myozenin 2                                                   |
| Nrap         | 1.66        | nebulin-related anchoring protein                            |
| Spna2        | 1.804       | spectrin alpha 2                                             |
| Tnnc1        | 3.256       | troponin C, cardiac/slow skeletal                            |
| Tnni1        | 4.827       | troponin I, skeletal, slow 1                                 |
| Tnnt1        | 15          | troponin T1, skeletal, slow                                  |
| Tpm3         | 3.49        | tropomyosin 3, gamma                                         |

**Table S3.** Following list of angiogenic genes were up-regulated in the quadriceps of ERR $\gamma$  transgenic mice as compared to wild type mice (N=3, each pooled from 3 mice, p<0.05, Bonferroni's multiple comparison test).

| <b>Locus</b>  | <b>Fold</b> | <b>Description</b>                                        |
|---------------|-------------|-----------------------------------------------------------|
| <b>Cdh5</b>   | 1.755       | cadherin 5                                                |
| <b>Crhr2</b>  | 2.072       | corticotropin releasing hormone receptor 2                |
| <b>Cxcl12</b> | 2.05        | chemokine (C-X-C motif) ligand 12                         |
| <b>Efnb2</b>  | 2.16        | ephrin B2                                                 |
| <b>Egfl7</b>  | 1.958       | EGF-like domain 7                                         |
| <b>Epas1</b>  | 1.867       | endothelial PAS domain protein 1                          |
| <b>Fgf1</b>   | 4.123       | fibroblast growth factor 1                                |
| <b>Flt1</b>   | 1.85        | FMS-like tyrosine kinase 1                                |
| <b>Gja1</b>   | 1.704       | gap junction membrane channel protein alpha 1             |
| <b>Kdr</b>    | 1.718       | kinase insert domain protein receptor                     |
| <b>Notch4</b> | 2.254       | Notch gene homolog 4 (Drosophila)                         |
| <b>Nrp1</b>   | 1.816       | neuropilin 1                                              |
| <b>Pdgfrb</b> | 1.895       | platelet derived growth factor receptor, beta polypeptide |
| <b>Plcd1</b>  | 2.009       | phospholipase C, delta 1                                  |
| <b>Qk</b>     | 1.875       | quaking                                                   |
| <b>Rhob</b>   | 1.702       | ras homolog gene family, member B                         |
| <b>Sox17</b>  | 1.98        | SRY-box containing gene 17                                |
| <b>Vegfa</b>  | 2.505       | vascular endothelial growth factor A                      |
| <b>Vegfb</b>  | 2.341       | vascular endothelial growth factor B                      |
| <b>VeZF1</b>  | 1.958       | vascular endothelial zinc finger 1                        |

**Table S4.** Following list of transcriptional regulators are targets of ERR $\gamma$  in the quadriceps of transgenic mice (N=3, each pooled from 3 mice, p<0.05, Bonferroni's multiple comparison test).

| <b>LOCUS</b>    | <b>DESCRIPTION</b>                                                     | <b>FOLD</b> |
|-----------------|------------------------------------------------------------------------|-------------|
| <b>Esrrb</b>    | estrogen related receptor, beta                                        | 3           |
| <b>Ppara</b>    | peroxisome proliferator activated receptor alpha                       | 2.444       |
| <b>Ppard</b>    | peroxisome proliferator activator receptor delta                       | 2.065       |
| <b>Ppargc1b</b> | peroxisome proliferative activated receptor, gamma, coactivator 1 beta | 1.988       |
